# Supplementary material for: Classifying transcription factor targets and discovering relevant biological features
Source: PubMed Central journal article supplement (PMC2441612; doi:10.1186/1745-6150-3-22), 2008-05-30
Supplement: 1745-6150-3-22-S1.pdf [file 1745-6150-3-22-S1.pdf]

| GOID  | GO_term                                                                               | Frequency                | Genome Frequency                      | Probability | Gene(s)                                                      | Directly Annotated GOID List  |
|-------|---------------------------------------------------------------------------------------|--------------------------|---------------------------------------|-------------|--------------------------------------------------------------|-------------------------------|
| 722   | telomerase-independent telomere maintenance                                           | 6 out of 60 genes, 10%   | 14 out of 7292 annotated genes, 0.1%  | 2.29E-09    | YRF1-1 YRF1-6<br>YRF1-5 YRF1-2<br>YRF1-3 YRF1-7              | 722                           |
| 6312  | mitotic recombination                                                                 | 6 out of 60 genes, 10%   | 26 out of 7292 annotated genes, 0.3%  | 8.72E-08    | YRF1-1 YRF1-6<br>YRF1-5 YRF1-2<br>YRF1-3 YRF1-7              | 722                           |
| 723   | telomere maintenance                                                                  | 7 out of 60 genes, 11.6% | 180 out of 7292 annotated genes, 2.4% | 0.00068     | YRF1-1 YRF1-6<br>YRF1-5 YRF1-2<br>YRF1-3 YRF1-7<br>MOT3      | 722:723                       |
| 6310  | DNA recombination                                                                     | 7 out of 60 genes, 11.6% | 192 out of 7292 annotated genes, 2.6% | 0.00099     | YRF1-1 YRF1-6<br>YRF1-5 YRF1-2<br>YER138C<br>YRF1-3 YRF1-7   | 722:6319                      |
| 7001  | chromosome organization and biogenesis (sensu Eukaryota)                              | 8 out of 60 genes, 13.3% | 374 out of 7292 annotated genes, 5.1% | 0.0113      | YRF1-1 YRF1-6<br>YRF1-5 YRF1-2<br>UTH1 YRF1-3<br>YRF1-7 MOT3 | 722:1308:723                  |
| 51276 | chromosome organization and biogenesis                                                | 8 out of 60 genes, 13.3% | 385 out of 7292 annotated genes, 5.2% | 0.01328     | YRF1-1 YRF1-6<br>YRF1-5 YRF1-2<br>UTH1 YRF1-3<br>YRF1-7 MOT3 | 722:1308:723                  |
| 45941 | positive regulation of transcription                                                  | 3 out of 60 genes, 5%    | 69 out of 7292 annotated genes, 0.9%  | 0.01942     | SFG1 UTH1<br>GAT1                                            | 45944:1308:45941              |
| 45935 | positive regulation of nucleobase, nucleoside, nucleotide and nucleic acid metabolism | 3 out of 60 genes, 5%    | 70 out of 7292 annotated genes, 0.9%  | 0.02016     | SFG1 UTH1<br>GAT1                                            | 45944:1308:45941              |
| 9893  | positive regulation of metabolism                                                     | 3 out of 60 genes, 5%    | 72 out of 7292 annotated genes, 0.9%  | 0.02169     | SFG1 UTH1<br>GAT1                                            | 45944:1308:45941              |
| 31325 | positive regulation of cellular metabolism                                            | 3 out of 60 genes, 5%    | 72 out of 7292 annotated genes, 0.9%  | 0.02169     | SFG1 UTH1<br>GAT1                                            | 45944:1308:45941              |
| 15980 | energy derivation by oxidation of organic compounds                                   | 5 out of 60 genes, 8.3%  | 201 out of 7292 annotated genes, 2.7% | 0.02483     | QCR6 GID8<br>TSL1 ZWF1                                       | 9060:45721:5992<br>:9051:5977 |

|       |                                                                |                           |                                         |         |                                                                                                                                           |                                                                                               |
|-------|----------------------------------------------------------------|---------------------------|-----------------------------------------|---------|-------------------------------------------------------------------------------------------------------------------------------------------|-----------------------------------------------------------------------------------------------|
|       |                                                                | 8.3%                      | 2.7%                                    |         | BMH1                                                                                                                                      |                                                                                               |
| 48522 | positive regulation of cellular process                        | 3 out of 60 genes, 5%     | 76 out of 7292 annotated genes, 1.0%    | 0.02493 | SFG1 UTH1<br>GAT1                                                                                                                         | 45944:1308:45941                                                                              |
| 51242 | positive regulation of cellular physiological process          | 3 out of 60 genes, 5%     | 76 out of 7292 annotated genes, 1.0%    | 0.02493 | SFG1 UTH1<br>GAT1                                                                                                                         | 45944:1308:45941                                                                              |
| 43119 | positive regulation of physiological process                   | 3 out of 60 genes, 5%     | 76 out of 7292 annotated genes, 1.0%    | 0.02493 | SFG1 UTH1<br>GAT1                                                                                                                         | 45944:1308:45941                                                                              |
| 6418  | tRNA aminoacylation for protein translation                    | 2 out of 60 genes, 3.3%   | 30 out of 7292 annotated genes, 0.4%    | 0.02558 | MSR1 FRS2                                                                                                                                 | 6420:6432                                                                                     |
| 43038 | amino acid activation                                          | 2 out of 60 genes, 3.3%   | 30 out of 7292 annotated genes, 0.4%    | 0.02558 | MSR1 FRS2                                                                                                                                 | 6420:6432                                                                                     |
| 43039 | tRNA aminoacylation                                            | 2 out of 60 genes, 3.3%   | 30 out of 7292 annotated genes, 0.4%    | 0.02558 | MSR1 FRS2                                                                                                                                 | 6420:6432                                                                                     |
| 44262 | cellular carbohydrate metabolism                               | 5 out of 60 genes, 8.3%   | 204 out of 7292 annotated genes, 2.7%   | 0.02625 | GID8 TSL1<br>ZWF1 EXG1<br>BMH1                                                                                                            | 45721:5992<br>:9051:6073:5977                                                                 |
| 48518 | positive regulation of biological process                      | 3 out of 60 genes, 5%     | 84 out of 7292 annotated genes, 1.1%    | 0.03216 | SFG1 UTH1<br>GAT1                                                                                                                         | 45944:1308:45941                                                                              |
| 6139  | nucleobase, nucleoside, nucleotide and nucleic acid metabolism | 19 out of 60 genes, 31.6% | 1526 out of 7292 annotated genes, 20.9% | 0.03405 | YRF1-1 YRF1-6<br>YRF1-5 SFG1<br>YRF1-2 GAT2<br>UTH1 ZWF1<br>GAT1 YER138C<br>RPA34 YRF1-3<br>MSR1 YRF1-7<br>ROX1 LSM5<br>HIM1 FRS2<br>MOT3 | 722:45944:6350<br>:1308:9051<br>:45941:6367:6319<br>:6360:6420<br>:122:398<br>:6402:6281:6432 |
| 45229 | external encapsulating structure organization and biogenesis   | 4 out of 60 genes, 6.6%   | 150 out of 7292 annotated genes, 2.0%   | 0.03514 | SED1 EXG1<br>CWP2 UTR2                                                                                                                    | 7047                                                                                          |

|       |                                                     |                         |                                       |         |                                                                         |                                    |
|-------|-----------------------------------------------------|-------------------------|---------------------------------------|---------|-------------------------------------------------------------------------|------------------------------------|
| 7047  | cell wall organization and biogenesis               | 4 out of 60 genes, 6.6% | 150 out of 7292 annotated genes, 2.0% | 0.03514 | SED1 EXG1<br>CWP2 UTR2                                                  | 7047                               |
| 6112  | energy reserve metabolism                           | 2 out of 60 genes, 3.3% | 36 out of 7292 annotated genes, 0.4%  | 0.03571 | TSL1 BMH1                                                               | 5992:5977                          |
| 5975  | carbohydrate metabolism                             | 5 out of 60 genes, 8.3% | 223 out of 7292 annotated genes, 3.0% | 0.03645 | GID8 TSL1<br>ZWF1 EXG1<br>BMH1                                          | 45721:5992:9051<br>:6073:5977      |
| 6259  | DNA metabolism                                      | 9 out of 60 genes, 15%  | 564 out of 7292 annotated genes, 7.7% | 0.0403  | YRF1-1 YRF1-6<br>YRF1-5 YRF1-2<br>UTH1 YER138C<br>YRF1-3 YRF1-7<br>HIM1 | 722:1308<br>:6319:6281             |
| 6091  | generation of precursor metabolites and energy      | 5 out of 60 genes, 8.3% | 233 out of 7292 annotated genes, 3.1% | 0.04269 | QCR6 GID8<br>TSL1 ZWF1<br>BMH1                                          | 9060:6122:45721<br>:5992:9051:5977 |
| 6066  | alcohol metabolism                                  | 4 out of 60 genes, 6.6% | 161 out of 7292 annotated genes, 2.2% | 0.04367 | ERG26 GID8<br>ADH7 ZWF1                                                 | 6696:45721<br>:6066:9051           |
| 6073  | glucan metabolism                                   | 2 out of 60 genes, 3.3% | 41 out of 7292 annotated genes, 0.5%  | 0.04513 | EXG1 BMH1                                                               | 6073:5977                          |
| 7124  | pseudohyphal growth                                 | 2 out of 60 genes, 3.3% | 50 out of 7292 annotated genes, 0.6%  | 0.06408 | SFG1 BMH1                                                               | 7124                               |
| 5976  | polysaccharide metabolism                           | 2 out of 60 genes, 3.3% | 56 out of 7292 annotated genes, 0.7%  | 0.07794 | EXG1 BMH1                                                               | 6073:5977                          |
| 44264 | cellular polysaccharide metabolism                  | 2 out of 60 genes, 3.3% | 56 out of 7292 annotated genes, 0.7%  | 0.07794 | EXG1 BMH1                                                               | 6073:5977                          |
| 45893 | positive regulation of transcription, DNA-dependent | 2 out of 60 genes, 3.3% | 64 out of 7292 annotated genes, 0.8%  | 0.09772 | SFG1 UTH1                                                               | 45944:1308                         |
