# Supplementary material for: Classifying transcription factor targets and discovering relevant biological features
Source: PubMed Central journal article supplement (PMC2441612; doi:10.1186/1745-6150-3-22), 2008-05-30
Supplement: 1745-6150-3-22-S2.pdf [file 1745-6150-3-22-S2.pdf]

| GOID  | GO_term                                                                      | Frequency                 | Genome Frequency                        | Probability | Gene(s)                                                                    | Directly Annotated GOID List                                                      |
|-------|------------------------------------------------------------------------------|---------------------------|-----------------------------------------|-------------|----------------------------------------------------------------------------|-----------------------------------------------------------------------------------|
| 6350  | transcription                                                                | 11 out of 13 genes, 84.6% | 493 out of 7292 annotated genes, 6.7%   | 9.25E-12    | ABF1 RCS1 SKN7<br>NRG1 MSN4 STE12<br>YAP6 UME6 CIN5 REB1<br>SWI4           | 45944:30466<br>:122:6350:6357<br>:6355:7329<br>:7068:6363                         |
| 6355  | regulation of transcription, DNA-dependent                                   | 9 out of 13 genes, 69.2%  | 311 out of 7292 annotated genes, 4.2%   | 2.85E-10    | ABF1 RCS1 NRG1<br>MSN4 STE12 YAP6<br>UME6 CIN5 REB1                        | 45944:30466:122:6357<br>:6355:7329:7068                                           |
| 45449 | regulation of transcription                                                  | 9 out of 13 genes, 69.2%  | 331 out of 7292 annotated genes, 4.5%   | 4.95E-10    | ABF1 RCS1 NRG1<br>MSN4 STE12 YAP6<br>UME6 CIN5 REB1                        | 45944:30466:122<br>:6357:6355:7329:7068                                           |
| 19219 | regulation of nucleobase, nucleoside, nucleotide and nucleic acid metabolism | 9 out of 13 genes, 69.2%  | 362 out of 7292 annotated genes, 4.9%   | 1.09E-09    | ABF1 RCS1 NRG1<br>MSN4 STE12 YAP6<br>UME6 CIN5 REB1                        | 45944:30466:122<br>:6357:6355:7329:7068                                           |
| 6139  | nucleobase, nucleoside, nucleotide and nucleic acid metabolism               | 13 out of 13 genes, 100%  | 1526 out of 7292 annotated genes, 20.9% | 1.47E-09    | ABF1 RCS1 CBF1<br>MBP1 SKN7 NRG1<br>MSN4 STE12 YAP6<br>UME6 CIN5 REB1 SWI4 | 45944:30466:715:6260<br>:6338:122:6333:<br>6350:6357:6355<br>:7329:7068:7131:6363 |
| 31323 | regulation of cellular metabolism                                            | 9 out of 13 genes, 69.2%  | 419 out of 7292 annotated genes, 5.7%   | 3.94E-09    | ABF1 RCS1 NRG1<br>MSN4 STE12 YAP6<br>UME6 CIN5 REB1                        | 45944:30466:122<br>:6357:6355:7329:7068                                           |
| 51244 | regulation of cellular physiological process                                 | 10 out of 13 genes, 76.9% | 613 out of 7292 annotated genes, 8.4%   | 3.97E-09    | ABF1 RCS1 MBP1<br>NRG1 MSN4 STE12<br>YAP6 UME6 CIN5 REB1                   | 45944:30466:122:74<br>:6357:6355:7329:7068                                        |
| 50794 | regulation of cellular process                                               | 10 out of 13 genes, 76.9% | 614 out of 7292 annotated genes, 8.4%   | 4.03E-09    | ABF1 RCS1 MBP1<br>NRG1 MSN4 STE12<br>YAP6 UME6 CIN5 REB1                   | 45944:30466:122:74<br>:6357:6355:7329:7068                                        |
| 50791 | regulation of physiological process                                          | 10 out of 13 genes, 76.9% | 631 out of 7292 annotated genes, 8.6%   | 5.26E-09    | ABF1 RCS1 MBP1<br>NRG1 MSN4 STE12<br>YAP6 UME6 CIN5 REB1                   | 45944:30466:122:74<br>:6357:6355:7329:7068                                        |
| 50789 | regulation of biological                                                     | 10 out of 13 genes, 76.9% | 641 out of 7292 annotated genes,        | 6.13E-09    | ABF1 RCS1 MBP1<br>NRG1 MSN4 STE12                                          | 45944:30466:122:74<br>:6357:6355:7329:7068                                        |

|       |                                                                                       |                          |                                       |          |                                               |                                            |
|-------|---------------------------------------------------------------------------------------|--------------------------|---------------------------------------|----------|-----------------------------------------------|--------------------------------------------|
|       | process                                                                               |                          | 8.7%                                  |          | YAP6 UME6 CIN5 REB1                           |                                            |
| 19222 | regulation of metabolism                                                              | 9 out of 13 genes, 69.2% | 445 out of 7292 annotated genes, 6.1% | 6.69E-09 | ABF1 RCS1 NRG1 MSN4 STE12 YAP6 UME6 CIN5 REB1 | 45944:30466:122 :6357:6355:7329:7068       |
| 6351  | transcription, DNA-dependent                                                          | 9 out of 13 genes, 69.2% | 450 out of 7292 annotated genes, 6.1% | 7.38E-09 | ABF1 RCS1 NRG1 MSN4 STE12 YAP6 UME6 CIN5 REB1 | 45944:30466:122 :6357:6355:7329 :7068:6363 |
| 6357  | regulation of transcription from RNA polymerase II promoter                           | 7 out of 13 genes, 53.8% | 187 out of 7292 annotated genes, 2.5% | 1.09E-08 | ABF1 RCS1 NRG1 STE12 YAP6 CIN5 REB1           | 45944:122 :6357:7329                       |
| 6366  | transcription from RNA polymerase II promoter                                         | 7 out of 13 genes, 53.8% | 285 out of 7292 annotated genes, 3.9% | 1.94E-07 | ABF1 RCS1 NRG1 STE12 YAP6 CIN5 REB1           | 45944:122 :6357:7329                       |
| 45944 | positive regulation of transcription from RNA polymerase II promoter                  | 4 out of 13 genes, 30.7% | 53 out of 7292 annotated genes, 0.7%  | 1.89E-06 | ABF1 RCS1 STE12 YAP6                          | 45944:7329                                 |
| 45893 | positive regulation of transcription, DNA-dependent                                   | 4 out of 13 genes, 30.7% | 64 out of 7292 annotated genes, 0.8%  | 3.98E-06 | ABF1 RCS1 STE12 YAP6                          | 45944:7329                                 |
| 45941 | positive regulation of transcription                                                  | 4 out of 13 genes, 30.7% | 69 out of 7292 annotated genes, 0.9%  | 5.35E-06 | ABF1 RCS1 STE12 YAP6                          | 45944:7329                                 |
| 45935 | positive regulation of nucleobase, nucleoside, nucleotide and nucleic acid metabolism | 4 out of 13 genes, 30.7% | 70 out of 7292 annotated genes, 0.9%  | 5.66E-06 | ABF1 RCS1 STE12 YAP6                          | 45944:7329                                 |
| 9893  | positive regulation of                                                                | 4 out of 13 genes, 30.7% | 72 out of 7292 annotated genes,       | 6.32E-06 | ABF1 RCS1 STE12 YAP6                          | 45944:7329                                 |

|       |                                                       |                          |                                         |          |                                                                   |                                                                                           |
|-------|-------------------------------------------------------|--------------------------|-----------------------------------------|----------|-------------------------------------------------------------------|-------------------------------------------------------------------------------------------|
|       | metabolism                                            |                          | 0.9%                                    |          |                                                                   |                                                                                           |
| 31325 | positive regulation of cellular metabolism            | 4 out of 13 genes, 30.7% | 72 out of 7292 annotated genes, 0.9%    | 6.32E-06 | ABF1 RCS1 STE12 YAP6                                              | 45944:7329                                                                                |
| 43119 | positive regulation of physiological process          | 4 out of 13 genes, 30.7% | 76 out of 7292 annotated genes, 1.0%    | 7.82E-06 | ABF1 RCS1 STE12 YAP6                                              | 45944:7329                                                                                |
| 48522 | positive regulation of cellular process               | 4 out of 13 genes, 30.7% | 76 out of 7292 annotated genes, 1.0%    | 7.82E-06 | ABF1 RCS1 STE12 YAP6                                              | 45944:7329                                                                                |
| 51242 | positive regulation of cellular physiological process | 4 out of 13 genes, 30.7% | 76 out of 7292 annotated genes, 1.0%    | 7.82E-06 | ABF1 RCS1 STE12 YAP6                                              | 45944:7329                                                                                |
| 48518 | positive regulation of biological process             | 4 out of 13 genes, 30.7% | 84 out of 7292 annotated genes, 1.1%    | 1.15E-05 | ABF1 RCS1 STE12 YAP6                                              | 45944:7329                                                                                |
| 44238 | primary metabolism                                    | 13 out of 13 genes, 100% | 3206 out of 7292 annotated genes, 43.9% | 2.29E-05 | ABF1 RCS1 CBF1 MBP1 SKN7 NRG1 MSN4 STE12 YAP6 UME6 CIN5 REB1 SWI4 | 45944:30466:715:6260:6338:122:9086:6333:6350:6357:6006:6355:7329:7068:7131:6363           |
| 44237 | cellular metabolism                                   | 13 out of 13 genes, 100% | 3400 out of 7292 annotated genes, 46.6% | 4.92E-05 | ABF1 RCS1 CBF1 MBP1 SKN7 NRG1 MSN4 STE12 YAP6 UME6 CIN5 REB1 SWI4 | 45944:30466:715:6260:6338:122:9086:6333:6350:6979:6357:6006:1324:6355:7329:7068:7131:6363 |
| 8152  | metabolism                                            | 13 out of 13 genes, 100% | 3490 out of 7292 annotated genes, 47.8% | 6.91E-05 | ABF1 RCS1 CBF1 MBP1 SKN7 NRG1 MSN4 STE12 YAP6 UME6 CIN5 REB1 SWI4 | 45944:30466:715:6260:6338:122:9086:6333:6350:6979:6357:6006:1324:6355:7329:7068:7131:6363 |
| 9628  | response to                                           | 5 out of 13              | 314 out of 7292                         | 0.00014  | SKN7 NRG1 MSN4                                                    | 6979:6970:9268                                                                            |

|       |                                       |                          |                                         |         |                                                                   |                                                                                                                                                                      |
|-------|---------------------------------------|--------------------------|-----------------------------------------|---------|-------------------------------------------------------------------|----------------------------------------------------------------------------------------------------------------------------------------------------------------------|
|       | abiotic stimulus                      | genes, 38.4%             | annotated genes, 4.3%                   |         | STE12 CIN5                                                        | :1324:7329<br>:9651:42493                                                                                                                                            |
| 50896 | response to stimulus                  | 6 out of 13 genes, 46.1% | 588 out of 7292 annotated genes, 8.0%   | 0.00028 | ABF1 SKN7 NRG1 MSN4 STE12 CIN5                                    | 715:6979:6970:9268:1324<br>:6950:7329:9651:42493                                                                                                                     |
| 42221 | response to chemical stimulus         | 4 out of 13 genes, 30.7% | 233 out of 7292 annotated genes, 3.1%   | 0.00059 | SKN7 MSN4 STE12 CIN5                                              | 6979:1324:7329:42493                                                                                                                                                 |
| 1403  | invasive growth (sensu Saccharomyces) | 2 out of 13 genes, 15.3% | 34 out of 7292 annotated genes, 0.4%    | 0.00163 | NRG1 STE12                                                        | 1403                                                                                                                                                                 |
| 50875 | cellular physiological process        | 13 out of 13 genes, 100% | 4722 out of 7292 annotated genes, 64.7% | 0.00352 | ABF1 RCS1 CBF1 MBP1 SKN7 NRG1 MSN4 STE12 YAP6 UME6 CIN5 REB1 SWI4 | 45944:30466:715<br>:6260:6338:122:6827<br>:9086:6333:7059:74<br>:6350:6979:6357:6006<br>:1302:1324:6355<br>:7329:747:30437<br>:7001:45836:7068<br>:7131:6363:7049:82 |
| 9987  | cellular process                      | 13 out of 13 genes, 100% | 4761 out of 7292 annotated genes, 65.2% | 0.00391 | ABF1 RCS1 CBF1 MBP1 SKN7 NRG1 MSN4 STE12 YAP6 UME6 CIN5 REB1 SWI4 | 45944:30466:715<br>:6260:6338:122:6827<br>:9086:6333:7059<br>:74:6350:6979:6357:6006<br>:1302:1324:6355<br>:7329:747:30437<br>:7001:45836:7068<br>:7131:6363:7049:82 |
| 6979  | response to oxidative stress          | 2 out of 13 genes, 15.3% | 54 out of 7292 annotated genes, 0.7%    | 0.00405 | SKN7 MSN4                                                         | 6979:1324                                                                                                                                                            |
| 7582  | physiological process                 | 13 out of 13 genes, 100% | 4790 out of 7292 annotated genes, 65.6% | 0.00423 | ABF1 RCS1 CBF1 MBP1 SKN7 NRG1 MSN4 STE12 YAP6 UME6 CIN5 REB1 SWI4 | 45944:30466:715<br>:6260:6338:122:6827<br>:9086:6333:7059:74<br>:6350:6979:6357:6006<br>:1302:1324:6355<br>:7329:747:30437<br>:7001:45836:7068<br>:7131:6363:7049:82 |

|       |                                                                            |                          |                                       |         |                     |                                   |
|-------|----------------------------------------------------------------------------|--------------------------|---------------------------------------|---------|---------------------|-----------------------------------|
| 6800  | oxygen and reactive oxygen species metabolism                              | 2 out of 13 genes, 15.3% | 56 out of 7292 annotated genes, 0.7%  | 0.00434 | SKN7 MSN4           | 6979:1324                         |
| 6970  | response to osmotic stress                                                 | 2 out of 13 genes, 15.3% | 61 out of 7292 annotated genes, 0.8%  | 0.00513 | SKN7 CIN5           | 6970:9651                         |
| 6950  | response to stress                                                         | 4 out of 13 genes, 30.7% | 426 out of 7292 annotated genes, 5.8% | 0.00543 | ABF1 SKN7 MSN4 CIN5 | 715:6979:6970<br>:1324:6950:9651  |
| 30447 | filamentous growth                                                         | 2 out of 13 genes, 15.3% | 91 out of 7292 annotated genes, 1.2%  | 0.01108 | NRG1 STE12          | 1403:7124                         |
| 6333  | chromatin assembly or disassembly                                          | 2 out of 13 genes, 15.3% | 100 out of 7292 annotated genes, 1.3% | 0.01326 | ABF1 CBF1           | 30466:6333                        |
| 6259  | DNA metabolism                                                             | 4 out of 13 genes, 30.7% | 564 out of 7292 annotated genes, 7.7% | 0.01449 | ABF1 CBF1 MBP1 UME6 | 30466:715:6260<br>:6338:6333:7131 |
| 6260  | DNA replication                                                            | 2 out of 13 genes, 15.3% | 105 out of 7292 annotated genes, 1.4% | 0.01455 | ABF1 MBP1           | 6260                              |
| 45892 | negative regulation of transcription, DNA-dependent                        | 2 out of 13 genes, 15.3% | 125 out of 7292 annotated genes, 1.7% | 0.02021 | ABF1 UME6           | 30466:122:7068                    |
| 40007 | growth                                                                     | 2 out of 13 genes, 15.3% | 125 out of 7292 annotated genes, 1.7% | 0.02021 | NRG1 STE12          | 1403:7124                         |
| 16481 | negative regulation of transcription                                       | 2 out of 13 genes, 15.3% | 129 out of 7292 annotated genes, 1.7% | 0.02144 | ABF1 UME6           | 30466:122:7068                    |
| 45934 | negative regulation of nucleobase, nucleoside, nucleotide and nucleic acid | 2 out of 13 genes, 15.3% | 139 out of 7292 annotated genes, 1.9% | 0.02465 | ABF1 UME6           | 30466:122:7068                    |

|       |                                                          |                          |                                       |         |                |                            |
|-------|----------------------------------------------------------|--------------------------|---------------------------------------|---------|----------------|----------------------------|
|       | metabolism                                               |                          |                                       |         |                |                            |
| 7001  | chromosome organization and biogenesis (sensu Eukaryota) | 3 out of 13 genes, 23.0% | 374 out of 7292 annotated genes, 5.1% | 0.02619 | ABF1 CBF1 UME6 | 30466:6338:6333:7001       |
| 51276 | chromosome organization and biogenesis                   | 3 out of 13 genes, 23.0% | 385 out of 7292 annotated genes, 5.2% | 0.02824 | ABF1 CBF1 UME6 | 30466:6338:6333:7001       |
| 31324 | negative regulation of cellular metabolism               | 2 out of 13 genes, 15.3% | 151 out of 7292 annotated genes, 2.0% | 0.02874 | ABF1 UME6      | 30466:122:7068             |
| 9892  | negative regulation of metabolism                        | 2 out of 13 genes, 15.3% | 158 out of 7292 annotated genes, 2.1% | 0.03125 | ABF1 UME6      | 30466:122:7068             |
| 7049  | cell cycle                                               | 3 out of 13 genes, 23.0% | 406 out of 7292 annotated genes, 5.5% | 0.03241 | MBP1 UME6 SWI4 | 74:45836:7068:7131:7049:82 |
| 51243 | negative regulation of cellular physiological process    | 2 out of 13 genes, 15.3% | 171 out of 7292 annotated genes, 2.3% | 0.03613 | ABF1 UME6      | 30466:122:7068             |
| 48523 | negative regulation of cellular process                  | 2 out of 13 genes, 15.3% | 171 out of 7292 annotated genes, 2.3% | 0.03613 | ABF1 UME6      | 30466:122:7068             |
| 43118 | negative regulation of physiological process             | 2 out of 13 genes, 15.3% | 173 out of 7292 annotated genes, 2.3% | 0.0369  | ABF1 UME6      | 30466:122:7068             |
| 48519 | negative regulation of biological process                | 2 out of 13 genes, 15.3% | 179 out of 7292 annotated genes, 2.4% | 0.03927 | ABF1 UME6      | 30466:122:7068             |
| 50876 | reproductive physiological process                       | 2 out of 13 genes, 15.3% | 197 out of 7292 annotated genes, 2.7% | 0.04672 | STE12 UME6     | 747:30437                  |

|       |                                                            |                          |                                       |         |            |                 |
|-------|------------------------------------------------------------|--------------------------|---------------------------------------|---------|------------|-----------------|
| 48610 | reproductive cellular physiological process                | 2 out of 13 genes, 15.3% | 197 out of 7292 annotated genes, 2.7% | 0.04672 | STE12 UME6 | 747:30437       |
| 6325  | establishment and/or maintenance of chromatin architecture | 2 out of 13 genes, 15.3% | 211 out of 7292 annotated genes, 2.8% | 0.05285 | ABF1 CBF1  | 30466:6338:6333 |
| 6323  | DNA packaging                                              | 2 out of 13 genes, 15.3% | 211 out of 7292 annotated genes, 2.8% | 0.05285 | ABF1 CBF1  | 30466:6338:6333 |
| 278   | mitotic cell cycle                                         | 2 out of 13 genes, 15.3% | 235 out of 7292 annotated genes, 3.2% | 0.064   | UME6 SWI4  | 7068:82         |
| 3     | reproduction                                               | 2 out of 13 genes, 15.3% | 263 out of 7292 annotated genes, 3.6% | 0.07796 | STE12 UME6 | 747:30437       |
