# Supplementary material for: Classifying transcription factor targets and discovering relevant biological features
Source: PubMed Central journal article supplement (PMC2441612; doi:10.1186/1745-6150-3-22), 2008-05-30

### Accuracy and Positives in TF Classifiers

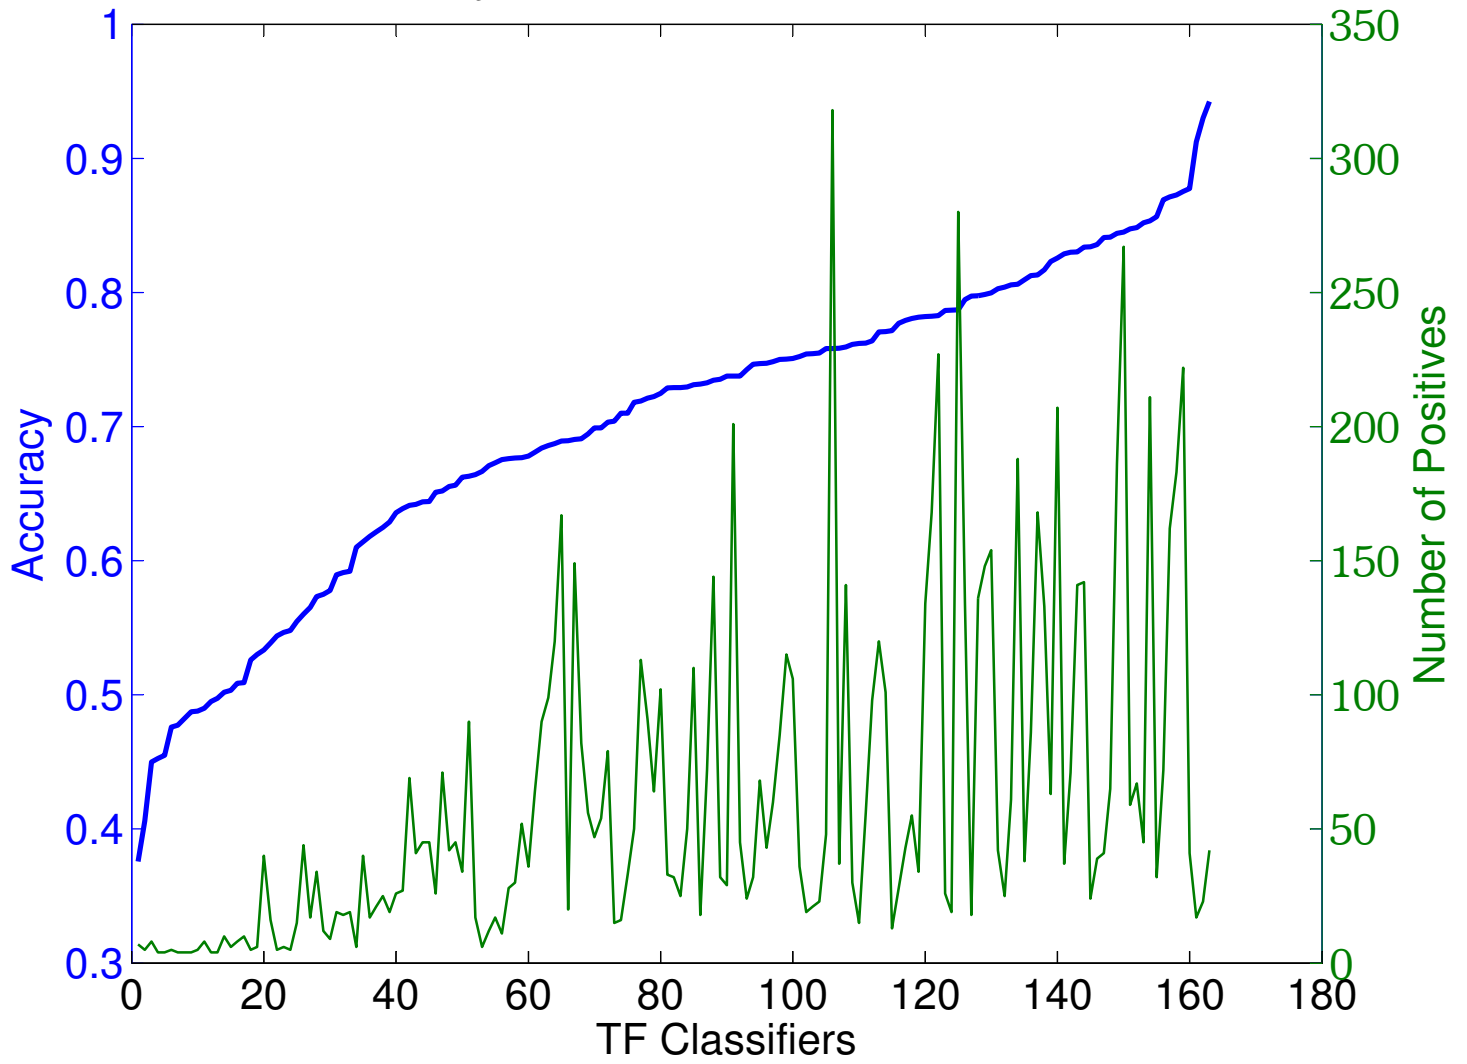

Supplement: 1745-6150-3-22-S3.pdf [file 1745-6150-3-22-S3.pdf]
